# Supplementary material for: Prostate Imaging-Reporting and Data System: Comparison of the Diagnostic Performance between Version 2.0 and 2.1 for Prostatic Peripheral Zone
Source: PubMed Central journal article supplement — Korean J Radiol. 2021 Apr 9;22(7):1100–9. doi: 10.3348/kjr.2020.0837 (PMC8236361; doi:10.3348/kjr.2020.0837), 2021-04-09
Supplement: kjr-22-1100-s001.pdf [file kjr-22-1100-s001.pdf]

## SUPPLEMENT

**Supplementary Table 1. MRI Protocols**

| Parameter                   | T2W                | DW                 | DCE   |
|-----------------------------|--------------------|--------------------|-------|
| Orientation                 | Axial and sagittal | Axial              | Axial |
| TR, msec                    | 3000–4000          | > 3000             | < 10  |
| TE, msec                    | 100                | < 90               | < 5   |
| Slice thickness, mm         | 3                  | 3                  | 4     |
| Field of view, mm           | 200                | 200                | 200   |
| Matrix                      |                    |                    |       |
| Phase                       | 350–351            | 121                | 179   |
| Frequency                   | 568                | 124                | 224   |
| In plane dimension          |                    |                    |       |
| Phase, mm                   | < 0.7              | < 2.5              | < 2.0 |
| Frequency, mm               | < 0.4              | < 2.5              | < 2.0 |
| b-value, s/mm <sup>2</sup>  | NA                 | 0, 100, 1000, 1500 | NA    |
| Temporal resolution, sec    | NA                 | NA                 | 4     |
| Total observation time, sec | NA                 | NA                 | > 120 |

Apparent diffusion coefficient map was generated with the b-values of 0, 100, and 1000 s/mm<sup>2</sup>. DCE = dynamic contrast-enhanced, DW = diffusion-weighted, MRI = magnetic resonance imaging, TE = echo time, TR = repetition time, T2W = T2-weighted
