# Supplementary material for: Prostate Imaging-Reporting and Data System: Comparison of the Diagnostic Performance between Version 2.0 and 2.1 for Prostatic Peripheral Zone
Source: PubMed Central journal article supplement — Korean J Radiol. 2021 Apr 9;22(7):1100–9. doi: 10.3348/kjr.2020.0837 (PMC8236361; doi:10.3348/kjr.2020.0837), 2021-04-09
Supplement: kjr-22-1100-s002.pdf [file kjr-22-1100-s002.pdf]

**Supplementary Table 2. Distribution of csPCa Stratified by ISUP Grade in Each PI-RADS Category**

| PI-RADS Category | ISUP Grade | Version 2.0 | Version 2.1 |
|------------------|------------|-------------|-------------|
| <b>Reader 1</b>  |            |             |             |
| 1-2              | No cancer  | 59          | 130         |
|                  | 1          | 5           | 13          |
|                  | 2          | 1           | 3           |
|                  | 3          | 1           | 3           |
|                  | 4          | 2           | 3           |
|                  | 5          | 0           | 0           |
| 3                | No cancer  | 47          | 21          |
|                  | 1          | 2           | 0           |
|                  | 2          | 1           | 1           |
|                  | 3          | 1           | 1           |
|                  | 4          | 1           | 1           |
|                  | 5          | 0           | 0           |
| 4                | No cancer  | 79          | 34          |
|                  | 1          | 18          | 12          |
|                  | 2          | 29          | 27          |
|                  | 3          | 17          | 15          |
|                  | 4          | 14          | 13          |
|                  | 5          | 4           | 4           |
| 5                | No cancer  | 2           | 2           |
|                  | 1          | 2           | 2           |
|                  | 2          | 9           | 9           |
|                  | 3          | 10          | 10          |
|                  | 4          | 12          | 12          |
|                  | 5          | 1           | 1           |
| <b>Reader 2</b>  |            |             |             |
| 1-2              | No cancer  | 42          | 129         |
|                  | 1          | 0           | 10          |
|                  | 2          | 0           | 3           |
|                  | 3          | 2           | 3           |
|                  | 4          | 0           | 0           |
|                  | 5          | 0           | 0           |
| 3                | No cancer  | 28          | 14          |
|                  | 1          | 3           | 2           |
|                  | 2          | 0           | 0           |
|                  | 3          | 1           | 1           |
|                  | 4          | 1           | 1           |
|                  | 5          | 0           | 0           |
| 4                | No cancer  | 113         | 40          |
|                  | 1          | 22          | 14          |
|                  | 2          | 31          | 28          |
|                  | 3          | 16          | 16          |
|                  | 4          | 14          | 14          |
|                  | 5          | 4           | 4           |
| 5                | No cancer  | 4           | 4           |
|                  | 1          | 2           | 1           |
|                  | 2          | 9           | 9           |
|                  | 3          | 10          | 9           |
|                  | 4          | 14          | 14          |
|                  | 5          | 1           | 1           |

csPCa = clinically significant prostate cancer, ISUP = International Society of Urologic Pathology, PI-RADS = Prostate Imaging-Reporting and Data System
